# Supplementary material for: Exercise-induced mitochondrial p53 repairs mtDNA mutations in mutator mice
Source: PubMed Central journal article supplement (PMC4733510; doi:10.1186/s13395-016-0075-9), 2016-01-31
Supplement: 13395_2016_75_MOESM1_ESM.pdf [file 13395_2016_75_MOESM1_ESM.pdf]

Figure S1

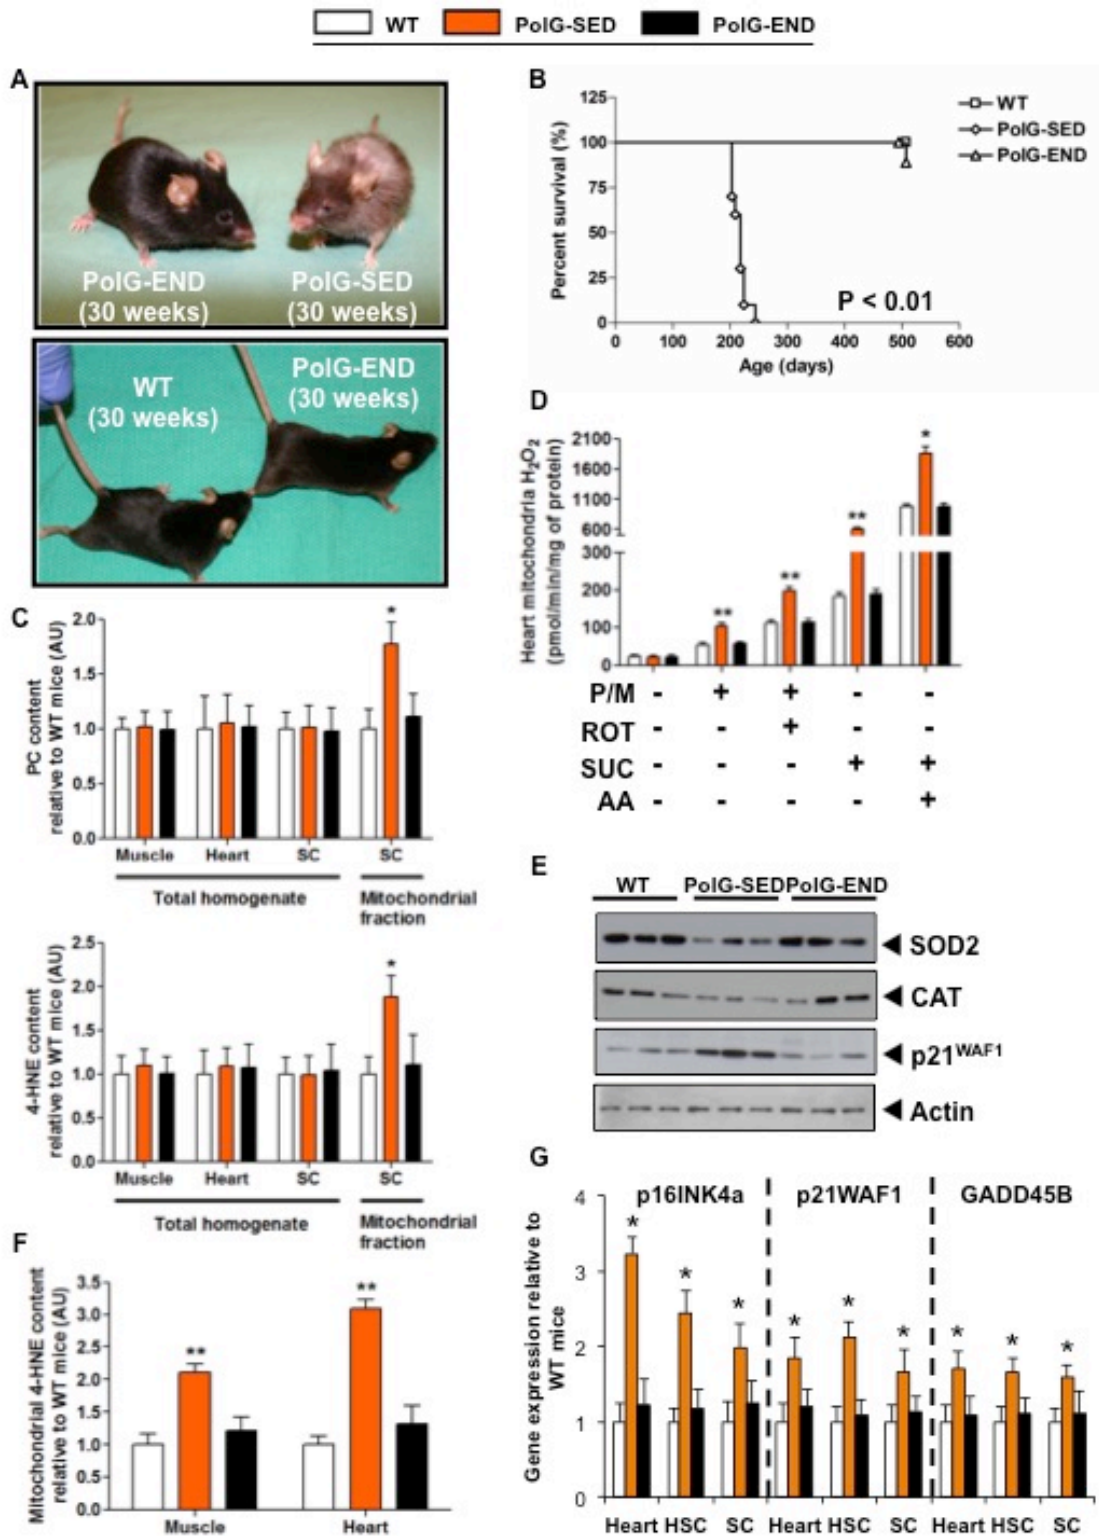

**Figure S1. Endurance exercise confers complete phenotype**

**protection, suppresses early mortality, mitigates mitochondrial ROS-mediated oxidative damage, increases cellular antioxidant capacity, and prevents cellular senescence in mtDNA mutator mice.** (A) Representative images from each group (~7.5 months of age) are displayed. The PolG mice in sedentary group (PolG-SED) showed progressive reduction in body size, increased kyphosis, loss of hair pigmentation and alopecia in comparison with littermate wild-type (WT) mice. Endurance exercise dramatically reversed the visible features of premature aging in PolG mice (PolG-END). (B) Endurance exercise suppresses early mortality reported in mtDNA mutator mice. Survival curves are significantly different ( $P < 0.01$ ) between PolG-SED ( $\diamond$ , diamond) vs. WT ( $\square$ , square) and PolG-END ( $\Delta$ , triangle) mice ( $n = 5/\text{group}$ ). The logrank test was used to test for significant differences in life span distribution between groups. (C) Protein carbonyls (PC; marker of protein oxidation) and 4-hydroxynonenal (4-HNE; marker of lipid peroxidation) content in muscle, heart, and SC total homogenate and satellite cell (SC) mitochondrial fraction of WT, PolG-SED, and PolG-END ( $n = 6-8/\text{group}$ ). (D)  $\text{H}_2\text{O}_2$  production rate in heart mitochondrial fractions of WT, PolG-SED, and PolG-END ( $n = 7-10/\text{group}$ ). Complex I and II substrates: P/M, pyruvate/malate and SUC, succinate (5mM each), respectively. Complex I and III inhibitors: ROT, rotenone and antimycin A, AA (0.5  $\mu\text{M}$  each), respectively. (E) Antioxidants mitochondrial superoxide dismutase 2 (SOD2; ~25 kDa) and catalase (~60 kDa) protein content, and marker of cellular senescence, p21WAF1 (~21 kDa) protein content (representative Western blot of muscle) in

muscle of WT, PolG-SED, and PolG-END (n = 4-6/group). Actin (~45 kDa) is used as a loading control. **(F)** 4-HNE content in muscle and heart mitochondrial fractions of WT, PolG-SED, and PolG-END (n = 4-6/group). **(G)** Expression of p53-mediated senescence markers: p21<sup>WAF1</sup>, p16<sup>INK4A</sup>, and GADD45B in heart, SC, and hematopoietic stem and progenitor cells (HSC) of WT, PolG-SED, and PolG-END (n = 4-6/group). Asterisk (PolG-SED vs. both WT and PolG-END): \* P < 0.05, \*\* P < 0.01. Error bars represent SEM. AU, *arbitrary units*.

Figure S2

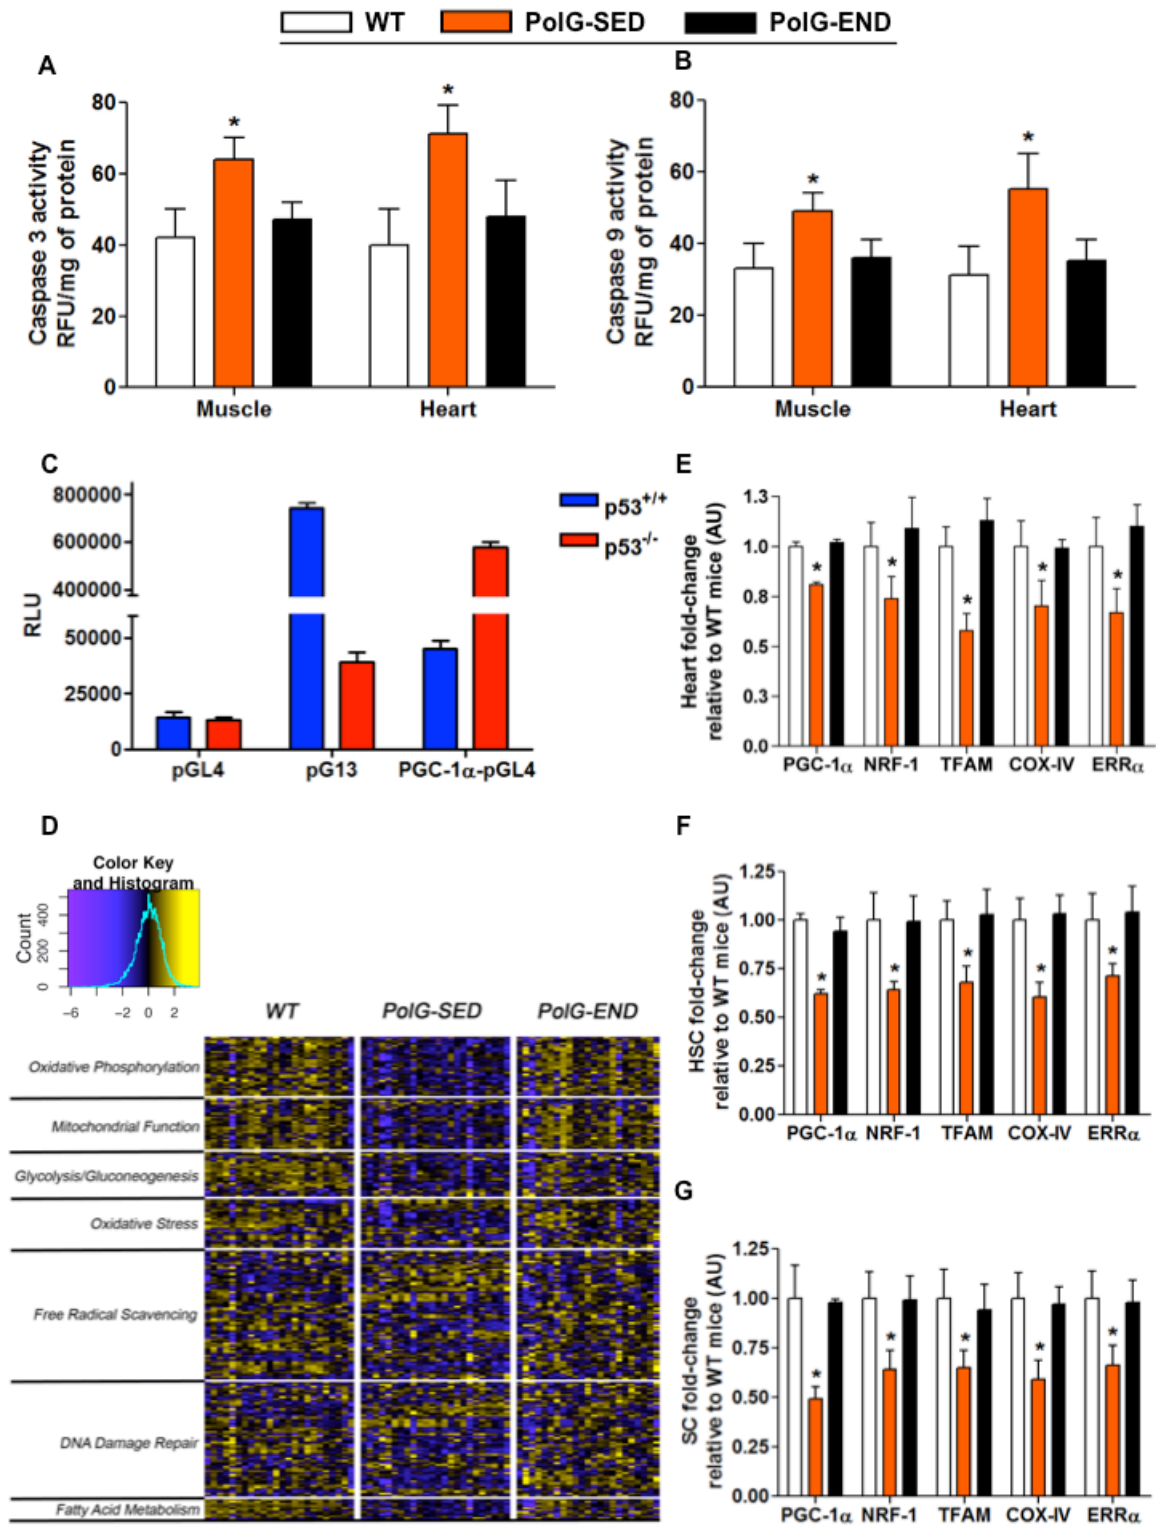

**Figure S2. Endurance exercise prevents dysregulated mitochondrial-induced apoptosis and reduces nuclear p53-mediated repression of PGC-1 $\alpha$  and promotes mitochondrial biogenesis in mutator mice.** Mitochondrial-induced apoptosis mediator **(A)** caspase 3 and **(B)** caspase 9 activity in muscle and heart of WT, PolG-SED, and PolG-END (n = 4-6/group). **(C)** p53 represses PGC-1 $\alpha$  promoter reporter. MEFs from  $p53^{+/+}$  and  $p53^{-/-}$  mice were transfected with empty pGL4 luciferase reporter vector or pGL4 luciferase reporter vector with -2.8 kb fragment of mouse PGC-1 $\alpha$  promoter encloned (three independent experiments). pG13 luciferase reporter plasmid (containing 13 copies of a synthetic p53 DNA binding site) was used as a positive control. RLU, *relative light units*. **(D)** Microarray-based Ingenuity Pathway Analysis of skeletal muscle shows enrichment of gene ontology categories of transcripts which are significantly over-represented in transcriptome (Fisher's exact test, n = 24/group). The gene probes within these categories are plotted as a heat map displaying the normalized expression changes within each gene. Expression pattern indicates that the changes between WT vs. PolG-SED are largely normalized through exercise in PolG-END mice. Up-regulation, yellow; down-regulation, blue; no change, black. **(E-G)** qPCR validation of PGC-1 $\alpha$  and its downstream targets in **(E)** heart, **(F)** HSC, and **(G)** SC of WT, PolG-SED, and PolG-END (n = 6-8/group). Asterisk (PolG-SED vs. both WT and PolG-END): \* P < 0.05. Error bars represent SEM. AU, *arbitrary units*.

Figure S3

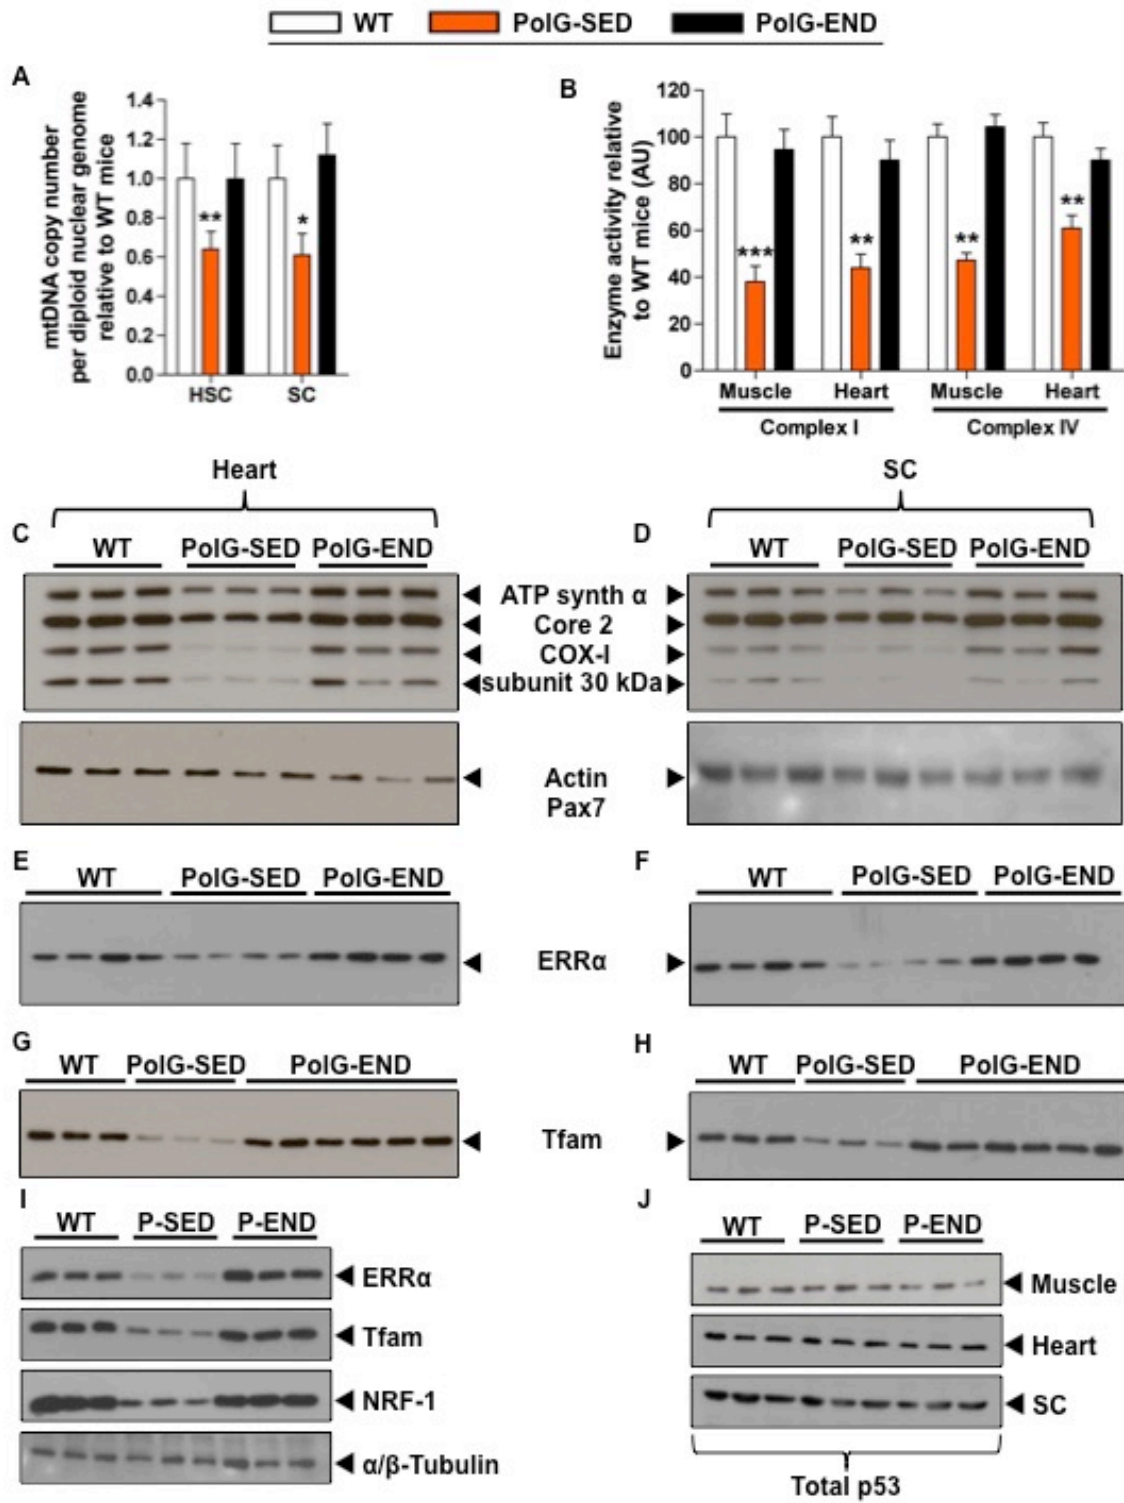

**Figure S3. Endurance exercise promotes systemic mitochondrial**

**biogenesis in mtDNA mutator mice. (A)** mtDNA copy number of HSC and SC from WT, PolG-SED, and PolG-END mice (n = 4-5/group). **(B)** Mitochondrial complex I and complex IV activity in muscle and heart of WT, PolG-SED, and PolG-END mice (n = 4-5/group). **(C-H)** Representative blots of mitochondrial OXPHOS subunits (top to bottom: CV-ATP5 alpha subunit (~55 kDa), CIII-UQCRC2 subunit (~48 kDa), CIV subunit I (~40 kDa), and CII-SDHB (~30kDa)), estrogen-related receptor alpha (ERR $\alpha$ ; ~50 kDa) and mitochondrial transcription factor A (Tfam; ~ 24 kDa) in heart **(C, E, G)** and SC **(D, F, H)** whole homogenate of WT, PolG-SED, and PolG-END (n = 4-6/group). **(I)** Representative blots of ERR $\alpha$  (~50 kDa), Tfam (~24 kDa), and nuclear-respiratory factor 1 (NRF-1; ~68 kDa) in muscle whole homogenate of WT, PolG-SED, and PolG-SED (n = 4-6/group). **(J)** Representative blots of total p53 (~53 kDa) in muscle, heart, and SC homogenates of WT, PolG-SED, and PolG-END (n = 5/group). Asterisk (PolG-SED vs. both WT and PolG-END): \* P < 0.05, \*\* P < 0.01, \*\*\* P < 0.001. Error bars represent SEM. AU, *arbitrary units*.

Figure S4.

A

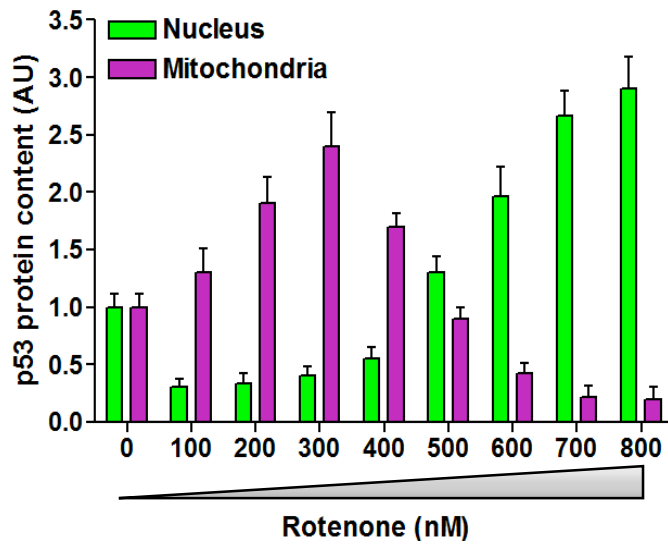

B

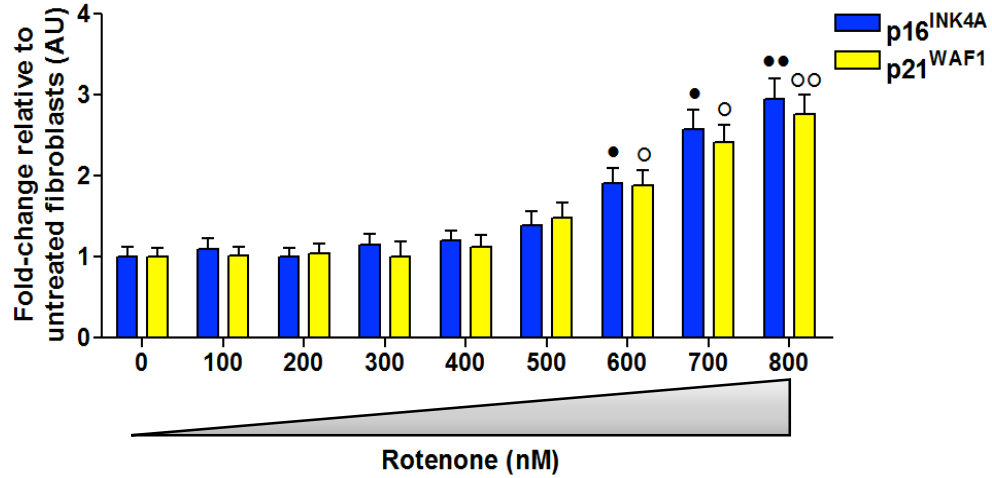

C

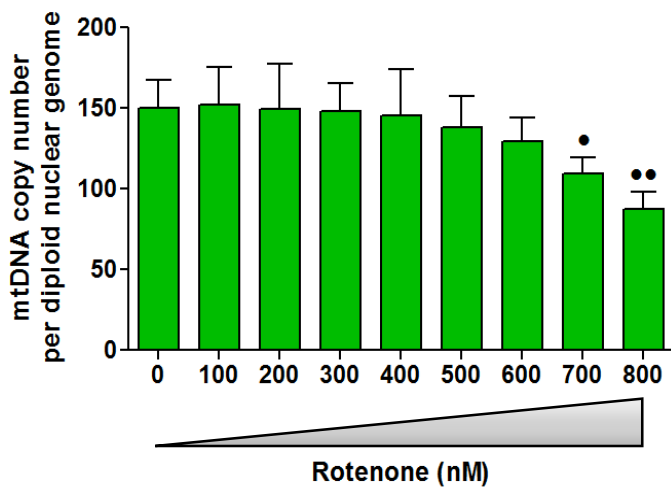



**Figure S4. Magnitude of mitochondrial ROS (physiological vs. pathological) regulates p53 subcellular localization.** (A) Mouse fibroblasts were treated with increasing concentrations of rotenone (mitochondrial complex I inhibitor known to increase mitochondrial ROS in a dose-dependent fashion) to assess the nuclear vs. mitochondrial p53 content (n = 3). (B) mRNA expression of p16<sup>INK4a</sup> and p21<sup>WAF1</sup> (downstream targets of nuclear p53) and (C) mtDNA copy number in mouse fibroblasts treated with increasing concentrations of rotenone (n = 3). ● P < 0.05, ●● P < 0.01; ○ P < 0.05, ○○ P < 0.05. Error bars represent SEM. AU, *arbitrary units*.

Figure S5.

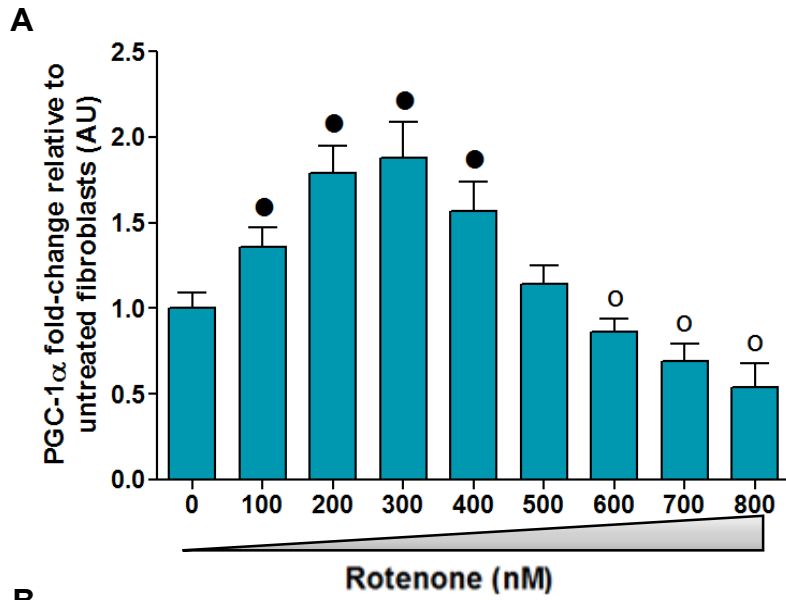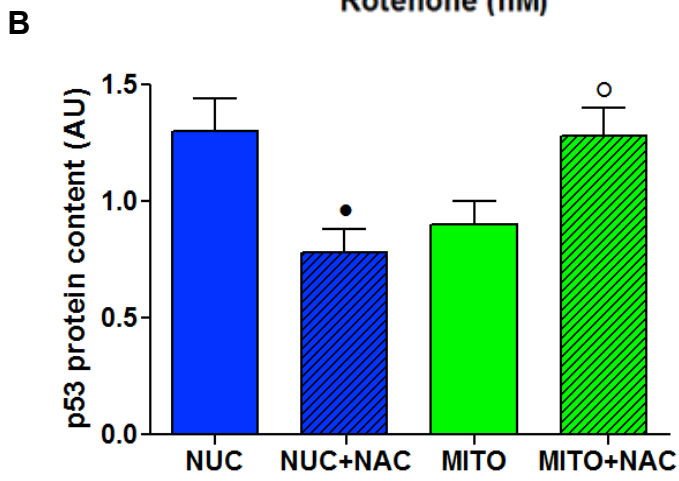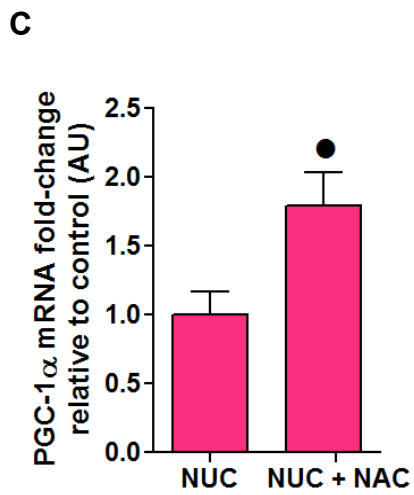

**Figure S5. Pre-treatment with exogenous antioxidant**

**preferentially shuttles p53 to mitochondria in response to stress. (A)** PGC-1 $\alpha$  mRNA expression in mouse fibroblasts treated with increasing concentrations of rotenone (n = 3). ● greater than 0 nM rotenone P < 0.05; ○ lower than 0 nM rotenone P < 0.05. **(B-C)** Fibroblasts were pre-incubated for one hour with 3 mM *N*-acetyl-L-cysteine (NAC; ROS scavenger) followed by 500 nM rotenone treatment to assess **(B)** nuclear vs. mitochondrial content of p53 and **(C)** PGC-1 $\alpha$  mRNA expression. NUC vs. NUC+NAC: ● P < 0.05; MITO vs. MITO+NAC: ○ P < 0.05. Error bars represent SEM. AU, *arbitrary units*.

Figure S6.

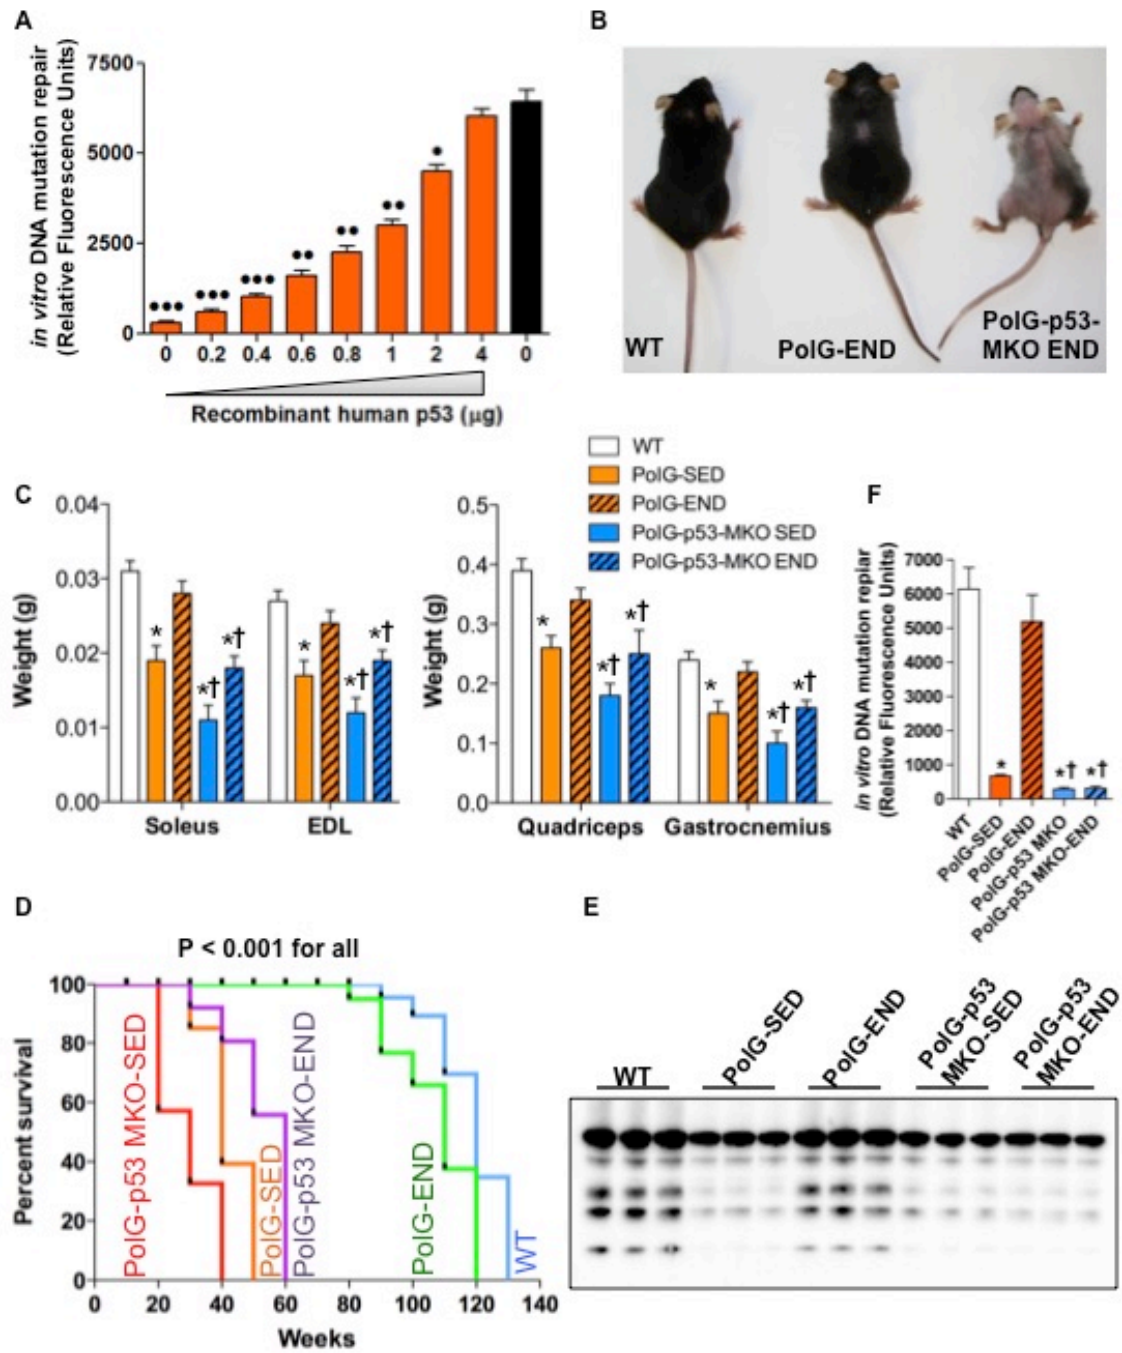

**Figure S6. Endurance exercise-mediated attenuation of sarcopenia, increase in endurance capacity, skeletal muscle mitochondrial biogenesis, and repair of muscle mtDNA mutations is p53 dependent.** (A) Recombinant human p53 enhances mutation repair in muscle mitochondrial extracts from PolG-SED (n = 5/group). (B) Representative images of WT, PolG-SED, and PolG-p53 MKO-END mice are displayed. The PolG-p53 MKO-END mice shows no rescue progressive reduction in body size, increased kyphosis, loss of hair pigmentation and alopecia in comparison with littermate wild-type (WT) mice. Endurance exercise dramatically reversed the visible features of premature aging in PolG mice (PolG-END). (C) Weight of skeletal muscle: soleus, extensor digitorum longus (EDL), quadriceps femoris, and gastrocnemius in WT, PolG-SED, PolG-END, PolG-p53 MKO-SED, and PolG-p53 MKO-END mice (n = 5-8/group). (D) Kaplan-Meier survival probability. The logrank test was used to test for significant differences in life span distribution between groups. (E) Representative Western blot of muscle mitochondrial OXPHOS subunits (top to bottom: CV-ATP5 alpha subunit (~55 kDa), CIII-UQCRC2 subunit (~48 kDa), CIV subunit I (~40 kDa), CII-SDHB (~30kDa), and CI-NDUFB8 subunit (~20 kDa)) in WT, PolG-SED, PolG-END, PolG-p53 MKO-SED, and PolG-p53 MKO-END mice (n = 4-6/group). (F) A fluorescence-based in vitro DNA primer extension-mutation repair assay in muscle mitochondrial extracts from WT, PolG-SED, PolG-END, PolG-p53 MKO-SED, and PolG-p53 MKO-END mice (n = 4-5/group) to assess the excision of the unpaired artificial point mutations. Asterisk (PolG-SED vs. both WT and PolG-END): \* P < 0.05; dagger (PolG-p53 MKO-SED vs. PolG-SED

OR PolG-p53 MKO-END vs. PolG-END): † P < 0.05; closed circle (PolG-END vs. PolG-SED): ● P < 0.05, ●● P < 0.01, ●●● P < 0.001. Error bars represent SEM. AU, *arbitrary units*.

**Table S1: WT, PoIG-SED, and PoIG-END Skeletal Muscle Microarray IPA-GO Analysis**

| GO Categories             | SEQ_ID       | Gene_Name | Description                                                                                           | PoIG-SED/WT Fold change | PoIG-END/PoIG-SED Fold change |
|---------------------------|--------------|-----------|-------------------------------------------------------------------------------------------------------|-------------------------|-------------------------------|
| Oxidative Phosphorylation | NM_007506    | Atp5g1    | ATP synthase, H <sup>+</sup> transporting, mitochondrial F0 complex, subunit c (subunit 9), isoform 1 | 0.789                   | 1.117                         |
| Oxidative Phosphorylation | NM_199008    | Cox11     | COX11 homolog, cytochrome c oxidase assembly protein (yeast)                                          | 0.708                   | 1.128                         |
| Oxidative Phosphorylation | BC059729     | Ndufa11   | NADH dehydrogenase (ubiquinone) 1 alpha subcomplex 11                                                 | 0.881                   | 1.262                         |
| Oxidative Phosphorylation | NM_028177    | Ndufab1   | NADH dehydrogenase (ubiquinone) 1, alpha/beta subcomplex, 1                                           | 0.786                   | 1.416                         |
| Oxidative Phosphorylation | AK011124     | Ndufs4    | NADH dehydrogenase (ubiquinone) Fe-S protein 4                                                        | 0.783                   | 1.284                         |
| Oxidative Phosphorylation | BC021616     | Ndufs8    | NADH dehydrogenase (ubiquinone) Fe-S protein 8                                                        | 0.740                   | 1.295                         |
| Oxidative Phosphorylation | XM_001004994 | Ndufv2    | NADH dehydrogenase (ubiquinone) flavoprotein 2                                                        | 0.899                   | 1.213                         |
| Oxidative Phosphorylation | NM_026438    | Ppa1      | pyrophosphatase (inorganic) 1                                                                         | 0.785                   | 1.144                         |
| Oxidative Phosphorylation | NM_028009    | Rpsud1    | RNA pseudouridylylase domain containing 1                                                             | 0.783                   | 1.264                         |
| Oxidative Phosphorylation | BC013509     | Sdhb      | succinate dehydrogenase complex, subunit B, iron sulfur (lp)                                          | 0.865                   | 1.184                         |
| Oxidative Phosphorylation | BC034408     | Uqcr      | ubiquinol-cytochrome c reductase (6.4kD) subunit                                                      | 0.937                   | 1.131                         |
| Oxidative Phosphorylation | NM_025899    | Uqcrc2    | ubiquinol cytochrome c reductase core protein 2                                                       | 0.831                   | 1.062                         |
| Oxidative Phosphorylation | NM_025710    | Uqcrcs1   | 1                                                                                                     | 0.829                   | 1.065                         |
| GO Categories             | SEQ_ID       | Gene_Name | Description                                                                                           | PoIG-SED/WT Fold change | PoIG-SED/PoIG-END Fold change |
| Mitochondrial Function    | NM_199008    | Cox11     | COX11 homolog, cytochrome c oxidase assembly protein (yeast)                                          | 0.708                   | 1.128                         |
| Mitochondrial Function    | NM_173740    | Maoa      | monoamine oxidase A                                                                                   | 1.296                   | 0.686                         |
| Mitochondrial Function    | BC059729     | Ndufa11   | NADH dehydrogenase (ubiquinone) 1 alpha subcomplex 11                                                 | 0.881                   | 1.262                         |
| Mitochondrial Function    | NM_028177    | Ndufab1   | NADH dehydrogenase (ubiquinone) 1, alpha/beta subcomplex, 1                                           | 0.786                   | 1.416                         |
| Mitochondrial Function    | NM_027175    | Ndufaf1   | NADH dehydrogenase (ubiquinone) 1 alpha subcomplex, assembly factor 1                                 | 0.756                   | 1.091                         |
| Mitochondrial Function    | AK011124     | Ndufs4    | NADH dehydrogenase (ubiquinone) Fe-S protein 4                                                        | 0.783                   | 1.284                         |
| Mitochondrial Function    | BC021616     | Ndufs8    | NADH dehydrogenase (ubiquinone) Fe-S protein 8                                                        | 0.740                   | 1.295                         |
| Mitochondrial Function    | XM_001004994 | Ndufv2    | NADH dehydrogenase (ubiquinone) flavoprotein 2                                                        | 0.899                   | 1.213                         |
| Mitochondrial Function    | BC013509     | Sdhb      | succinate dehydrogenase complex, subunit B, iron sulfur (lp)                                          | 0.865                   | 1.184                         |
| Mitochondrial Function    | NM_025899    | Uqcrc2    | ubiquinol cytochrome c reductase core protein 2                                                       | 0.831                   | 1.062                         |
| Mitochondrial Function    | NM_025710    | Uqcrcs1   | 1                                                                                                     | 0.829                   | 1.065                         |

| GO Categories              | SEQ_ID       | Gene_Name | Description                                                                           | PoIG-SED/WT<br>Fold change | PoIG-SED/PoIG-<br>END Fold change |
|----------------------------|--------------|-----------|---------------------------------------------------------------------------------------|----------------------------|-----------------------------------|
| Glycolysis/Gluconeogenesis | NM_019811    | Acss2     | acyl-CoA synthetase short-chain family member 2                                       | 0.714                      | 1.252                             |
| Glycolysis/Gluconeogenesis | BC100730     | Adh4      | alcohol dehydrogenase 4 (class II), pi polypeptide                                    | 0.824                      | 1.230                             |
| Glycolysis/Gluconeogenesis | NM_027406    | Aldh111   | aldehyde dehydrogenase 1 family, member L1                                            | 0.636                      | 1.127                             |
| Glycolysis/Gluconeogenesis | NM_175438    | Aldh4a1   | aldehyde dehydrogenase 4 family, member A1                                            | 0.642                      | 1.222                             |
| Glycolysis/Gluconeogenesis | NM_138600    | Aldh7a1   | aldehyde dehydrogenase family 7, member A1                                            | 0.757                      | 1.044                             |
| Glycolysis/Gluconeogenesis | BC026680     | Dlat      | dihydrolipoamide S-acetyltransferase (E2 component of pyruvate dehydrogenase complex) | 0.803                      | 1.234                             |
| Glycolysis/Gluconeogenesis | NM_010292    | Gck       | glucokinase                                                                           | 0.663                      | 1.179                             |
| Glycolysis/Gluconeogenesis | NM_013820    | Hk2       | hexokinase 2                                                                          | 0.781                      | 1.189                             |
| Glycolysis/Gluconeogenesis | AK076803     | Pfcp      | phosphofructokinase, platelet                                                         | 1.110                      | 1.064                             |
| GO Categories              | SEQ_ID       | Gene_Name | Description                                                                           | PoIG-SED/WT<br>Fold change | PoIG-SED/PoIG-<br>END Fold change |
| Oxidative Stress           | BC062138     | Actc1     | actin, alpha, cardiac                                                                 | 1.999                      | 0.605                             |
| Oxidative Stress           | BC021796     | Actg1     | actin, gamma, cytoplasmic 1                                                           | 1.310                      | 0.974                             |
| Oxidative Stress           | BC057876     | Dnaja1    | DnaJ (Hsp40) homolog, subfamily A, member 1                                           | 0.803                      | 1.145                             |
| Oxidative Stress           | BC022948     | Dnaja4    | DnaJ (Hsp40) homolog, subfamily A, member 4                                           | 0.761                      | 1.609                             |
| Oxidative Stress           | NM_010357    | Gsta4     | glutathione S-transferase, alpha 4                                                    | 0.817                      | 1.172                             |
| Oxidative Stress           | BC058163     | Gstk1     | glutathione S-transferase kappa 1                                                     | 0.707                      | 1.305                             |
| Oxidative Stress           | NM_008183    | Gstm2     | glutathione S-transferase, mu 2                                                       | 0.820                      | 0.954                             |
| Oxidative Stress           | NM_010359    | Gstm3     | glutathione S-transferase, mu 3                                                       | 0.996                      | 0.949                             |
| Oxidative Stress           | NM_010361    | Gstt2     | glutathione S-transferase, theta 2                                                    | 1.140                      | 0.962                             |
| Oxidative Stress           | BC002081     | Jun       | Jun oncogene                                                                          | 0.676                      | 1.353                             |
| Oxidative Stress           | NM_001025577 | Maf       | avian musculoaponeurotic fibrosarcoma (v-maf) AS42 oncogene homolog                   | 1.201                      | 0.937                             |
| Oxidative Stress           | NM_016737    | Stip1     | stress-induced phosphoprotein 1                                                       | 0.795                      | 1.203                             |



| GO Categories           | SEQ_ID       | Gene_Name | Description                                                           | PoIG-SED/WT<br>Fold change | PoIG-SED/PoIG-<br>END Fold change |
|-------------------------|--------------|-----------|-----------------------------------------------------------------------|----------------------------|-----------------------------------|
| Free Radical Scavenging | BC049768     | Alox5     | arachidonate 5-lipoxygenase                                           | 0.907                      | 1.069                             |
| Free Radical Scavenging | BC095964     | Bcl2      | B-cell leukemia/lymphoma 2                                            | 0.863                      | 1.344                             |
| Free Radical Scavenging | BC064058     | Cd28      | CD28 antigen                                                          | 1.138                      | 0.758                             |
| Free Radical Scavenging | NM_013706    | Cd52      | CD52 antigen                                                          | 1.309                      | 0.808                             |
| Free Radical Scavenging | NM_007779    | Csf1r     | colony stimulating factor 1 receptor                                  | 1.121                      | 1.003                             |
| Free Radical Scavenging | NM_001012477 | Cxcl12    | chemokine (C-X-C motif) ligand 12                                     | 1.454                      | 0.973                             |
| Free Radical Scavenging | NM_007807    | Cybb      | cytochrome b-245, beta polypeptide                                    | 1.633                      | 0.643                             |
| Free Radical Scavenging | NM_007837    | Ddit3     | DNA-damage inducible transcript 3                                     | 0.749                      | 1.261                             |
| Free Radical Scavenging | BC017681     | Egf       | epidermal growth factor                                               | 1.264                      | 0.727                             |
| Free Radical Scavenging | NM_007953    | Esrra     | estrogen related receptor, alpha                                      | 0.760                      | 1.288                             |
| Free Radical Scavenging | M13226       | Gzma      | granzyme A                                                            | 0.816                      | 1.184                             |
| Free Radical Scavenging | NM_013820    | Hk2       | hexokinase 2                                                          | 0.781                      | 1.189                             |
| Free Radical Scavenging | NM_001012401 | Hspb6     | heat shock protein, alpha-crystallin-related, B6                      | 0.852                      | 1.317                             |
| Free Radical Scavenging | NM_010493    | Icam1     | intercellular adhesion molecule                                       | 1.468                      | 0.785                             |
| Free Radical Scavenging | AK033126     | Immt      | inner membrane protein, mitochondrial                                 | 0.830                      | 1.160                             |
| Free Radical Scavenging | NM_010577    | Itga5     | integrin alpha 5 (fibronectin receptor alpha)                         | 0.810                      | 1.257                             |
| Free Radical Scavenging | BC002081     | Jun       | Jun oncogene                                                          | 0.676                      | 1.353                             |
| Free Radical Scavenging | BC094612     | Ltbp1     | latent transforming growth factor beta binding protein 1              | 1.212                      | 0.898                             |
| Free Radical Scavenging | NM_027175    | Ndufaf1   | NADH dehydrogenase (ubiquinone) 1 alpha subcomplex, assembly factor 1 | 0.756                      | 1.091                             |
| Free Radical Scavenging | BC006703     | Prnp      | prion protein                                                         | 0.799                      | 1.157                             |
| Free Radical Scavenging | AK085938     | Prodh     | proline dehydrogenase                                                 | 0.882                      | 1.282                             |
| Free Radical Scavenging | AK141959     | Ralgds    | ral guanine nucleotide dissociation stimulator                        | 1.358                      | 0.922                             |
| Free Radical Scavenging | BC055340     | Slc2a1    | solute carrier family 2 (facilitated glucose transporter), member 1   | 0.593                      | 1.540                             |
| Free Radical Scavenging | NM_011421    | Smpd1     | sphingomyelin phosphodiesterase 1, acid lysosomal                     | 0.818                      | 1.215                             |
| Free Radical Scavenging | NM_025710    | Uqcrcs1   | ubiquinol-cytochrome c reductase, Rieske iron-sulfur polypeptide 1    | 0.829                      | 1.065                             |
| Free Radical Scavenging | NM_011693    | Vcam1     | vascular cell adhesion molecule 1                                     | 1.287                      | 0.791                             |

| GO Categories         | SEQ_ID       | Gene_Name | Description                                                             | PoIG-SED/WT Fold change | PoIG-SED/PoIG-END Fold change |
|-----------------------|--------------|-----------|-------------------------------------------------------------------------|-------------------------|-------------------------------|
| DNA Damage Repair     | NM_175086    | Aqtr1b    | angiotensin II receptor, type 1b                                        | 0.949                   | 1.178                         |
| DNA Damage Repair     | BC049768     | Alox5     | arachidonate 5-lipoxygenase                                             | 0.907                   | 1.069                         |
| DNA Damage Repair     | BC095964     | Bcl2      | B-cell leukemia/lymphoma 2                                              | 0.863                   | 1.344                         |
| DNA Damage Repair     | BC044841     | Ccnd1     | cyclin D1                                                               | 1.409                   | 0.830                         |
| DNA Damage Repair     | NM_007642    | Cd28      | CD28 antigen                                                            | 1.838                   | 0.505                         |
| DNA Damage Repair     | NM_007651    | Cd53      | CD53 antigen                                                            | 1.592                   | 0.721                         |
| DNA Damage Repair     | NM_001012477 | Cxcl12    | chemokine (C-X-C motif) ligand 12                                       | 1.454                   | 0.973                         |
| DNA Damage Repair     | NM_007837    | Ddit3     | DNA-damage inducible transcript 3                                       | 0.749                   | 1.261                         |
| DNA Damage Repair     | BC017681     | Egf       | epidermal growth factor                                                 | 1.264                   | 0.727                         |
| DNA Damage Repair     | NM_007953    | Esrra     | estrogen related receptor, alpha                                        | 0.760                   | 1.288                         |
| DNA Damage Repair     | NM_133765    | Fbxo31    | F-box only protein 31                                                   | 0.726                   | 1.071                         |
| DNA Damage Repair     | NM_008046    | Fst       | follistatin                                                             | 1.409                   | 0.762                         |
| DNA Damage Repair     | NM_020567    | Gmnn      | geminin                                                                 | 0.608                   | 1.436                         |
| DNA Damage Repair     | NM_010370    | Gzma      | granzyme A                                                              | 0.978                   | 1.014                         |
| DNA Damage Repair     | NM_010567    | Inpp1     | inositol polyphosphate phosphatase-like 1                               | 0.785                   | 1.223                         |
| DNA Damage Repair     | NM_010591    | Jun       | Jun oncogene                                                            | 0.797                   | 1.265                         |
| DNA Damage Repair     | NM_013823    | Kl        | klotho                                                                  | 1.259                   | 0.851                         |
| DNA Damage Repair     | L04275       | Msr1      | macrophage scavenger receptor 1                                         | 1.058                   | 1.038                         |
| DNA Damage Repair     | NM_011853    | Oas1b     | 2'-5' oligoadenylate synthetase 1B                                      | 1.391                   | 0.674                         |
| DNA Damage Repair     | NM_133752    | Opa1      | optic atrophy 1 homolog (human)                                         | 0.887                   | 1.129                         |
| DNA Damage Repair     | AK032149     | Ppargc1a  | peroxisome proliferative activated receptor, gamma, coactivator 1 alpha | 0.798                   | 1.585                         |
| DNA Damage Repair     | NM_011170    | Prnp      | prion protein                                                           | 0.754                   | 1.190                         |
| DNA Damage Repair     | NM_148945    | Rps6ka3   | ribosomal protein S6 kinase polypeptide 3                               | 1.102                   | 0.872                         |
| DNA Damage Repair     | NM_009477    | Upp1      | uridine phosphorylase 1                                                 | 1.044                   | 1.029                         |
| GO Categories         | SEQ_ID       | Gene_Name | Description                                                             | PoIG-SED/WT Fold change | PoIG-SED/PoIG-END Fold change |
| Fatty Acid Metabolism | BC060650     | Aldh4a1   | aldehyde dehydrogenase 4 family, member A1                              | 0.623                   | 1.166                         |
| Fatty Acid Metabolism | BC045199     | Acad11    | acyl-Coenzyme A dehydrogenase family, member 11                         | 0.767                   | 1.157                         |
| Fatty Acid Metabolism | NM_007383    | Acads     | acyl-Coenzyme A dehydrogenase, short chain                              | 0.682                   | 1.315                         |
| Fatty Acid Metabolism | NM_025826    | Acadsb    | acyl-Coenzyme A dehydrogenase, short/branched chain                     | 0.732                   | 1.185                         |
| Fatty Acid Metabolism | BC100730     | Adh4      | alcohol dehydrogenase 4 (class II), pi polypeptide                      | 0.824                   | 1.230                         |
